# Supplementary material
Source: PubMed Central journal article supplement (PMC5181791)
Supplement: NIHMS833946-supplement-3.pdf [file NIHMS833946-supplement-3.pdf]

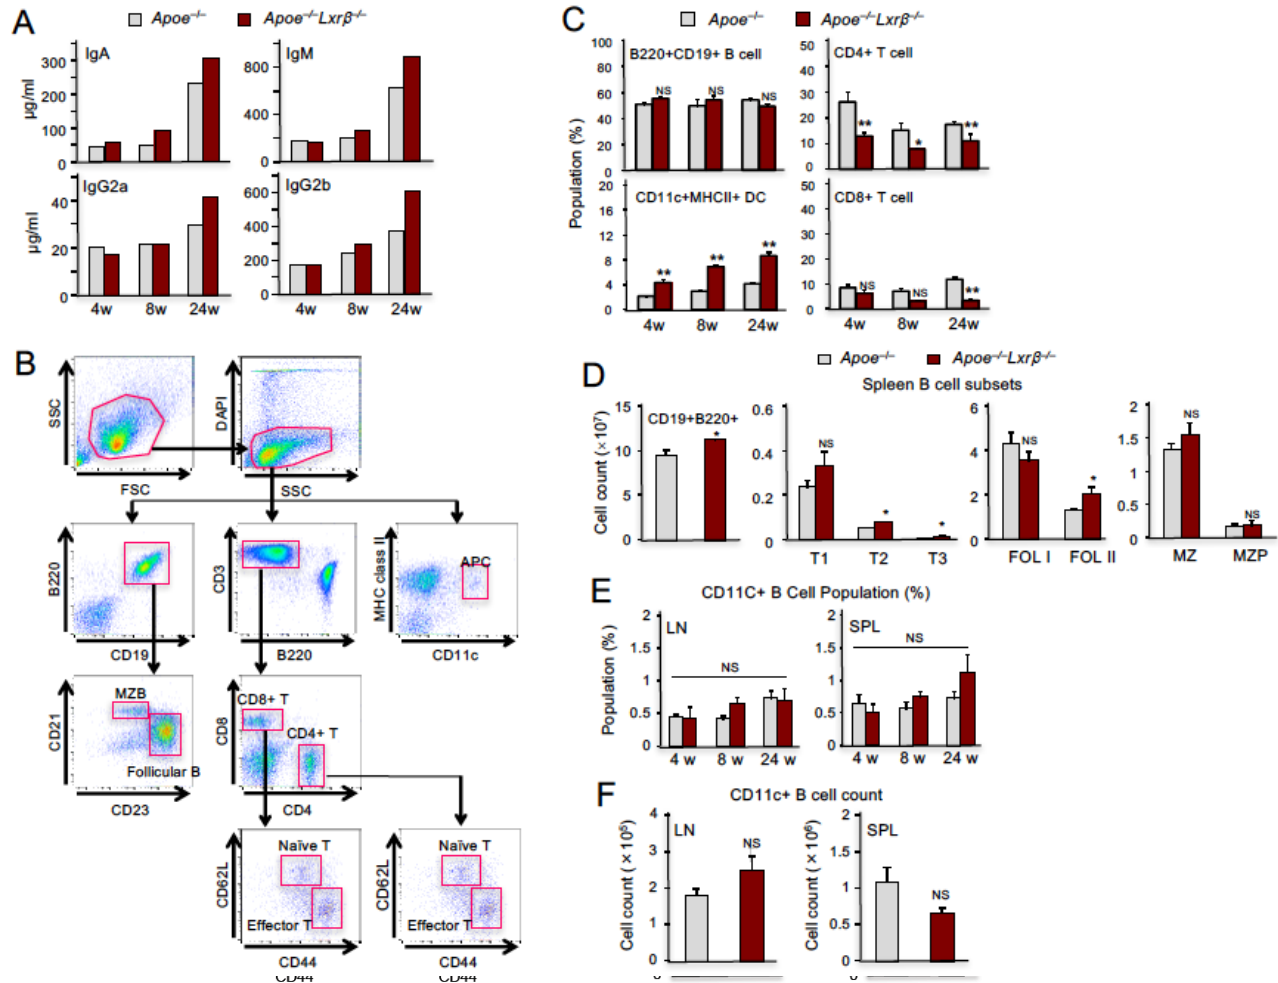

**Figure S1. Related to Figure 1. Immune dysfunction in *ApoE*<sup>-/-</sup>*Lxrβ*<sup>-/-</sup> mice. (A) Elevated levels of total immunoglobulins in the plasma of *ApoE*<sup>-/-</sup>*Lxrβ*<sup>-/-</sup> mice. Plasma samples were pooled from 4-6 mice. (B) Gating strategy used for phenotyping lymph node and spleen (Muppidi et al., 2011). (C) Expanded CD11<sup>+</sup>MHC class II<sup>+</sup> APC populations and decreased T cell populations in spleens of *ApoE*<sup>-/-</sup> and *ApoE*<sup>-/-</sup>*Lxrβ*<sup>-/-</sup> mice. (D) Cell counts of the indicated cell populations in spleen of *ApoE*<sup>-/-</sup> and *ApoE*<sup>-/-</sup>*Lxrβ*<sup>-/-</sup> mice analyzed by flow cytometry. (E) Percentages of CD11<sup>+</sup>B cells were gated in CD19<sup>+</sup>B220<sup>+</sup> cells by flow cytometry. (F) Cell counts of CD11<sup>+</sup>B cells gated in CD19<sup>+</sup>B220<sup>+</sup> cells by flow cytometry. N=4-6 per group. Statistical analysis was performed with Student's t test. \**p* < 0.05, \*\**p* < 0.01, NS, not significant. Error bars represent means +/- SEM.**

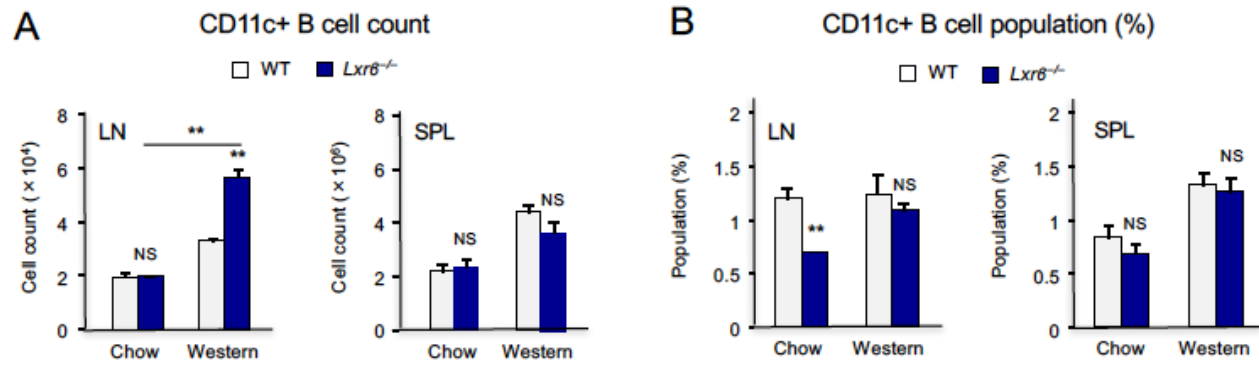

**Figure S2. Related to Figure 2. Cell counts and percentages of CD11c<sup>+</sup> B cells gated in CD19<sup>+</sup> B220<sup>+</sup> cells by flow cytometry.** N=4-6 per group. Statistical analysis was performed with Student's t test. \*\**p* < 0.01, NS, not significant. Error bars represent means +/- SEM.

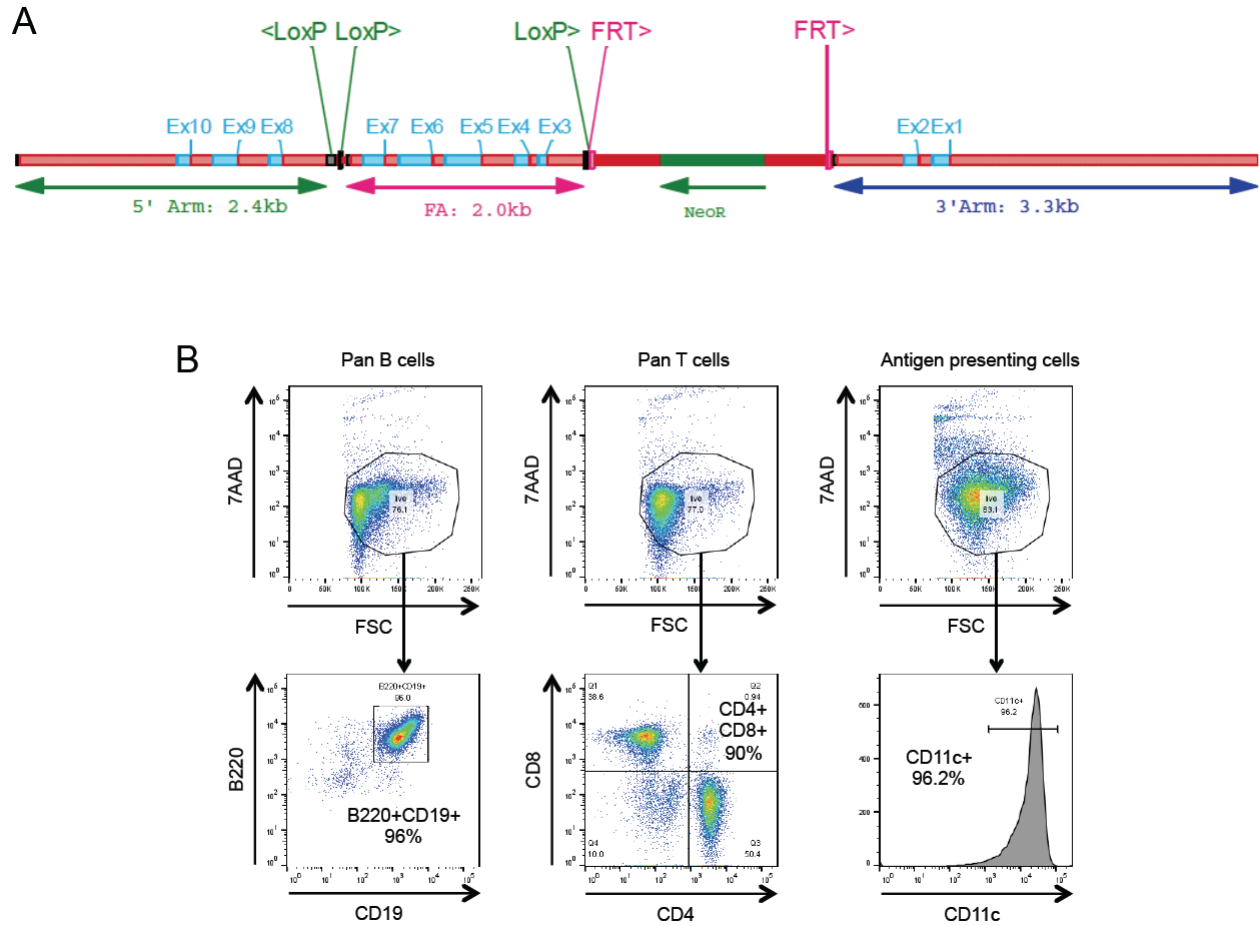

**Figure S3. Related to Figure 5. Analysis of cell type-selective *Lxrβ*-deficient mice. (A) Targeting strategy for the generation of conditional *Lxrβ* knockout mice. (B). The purity of pan B cells, pan T cells and CD11c+ APCs isolated from wild-type spleen was determined by flow cytometry.**

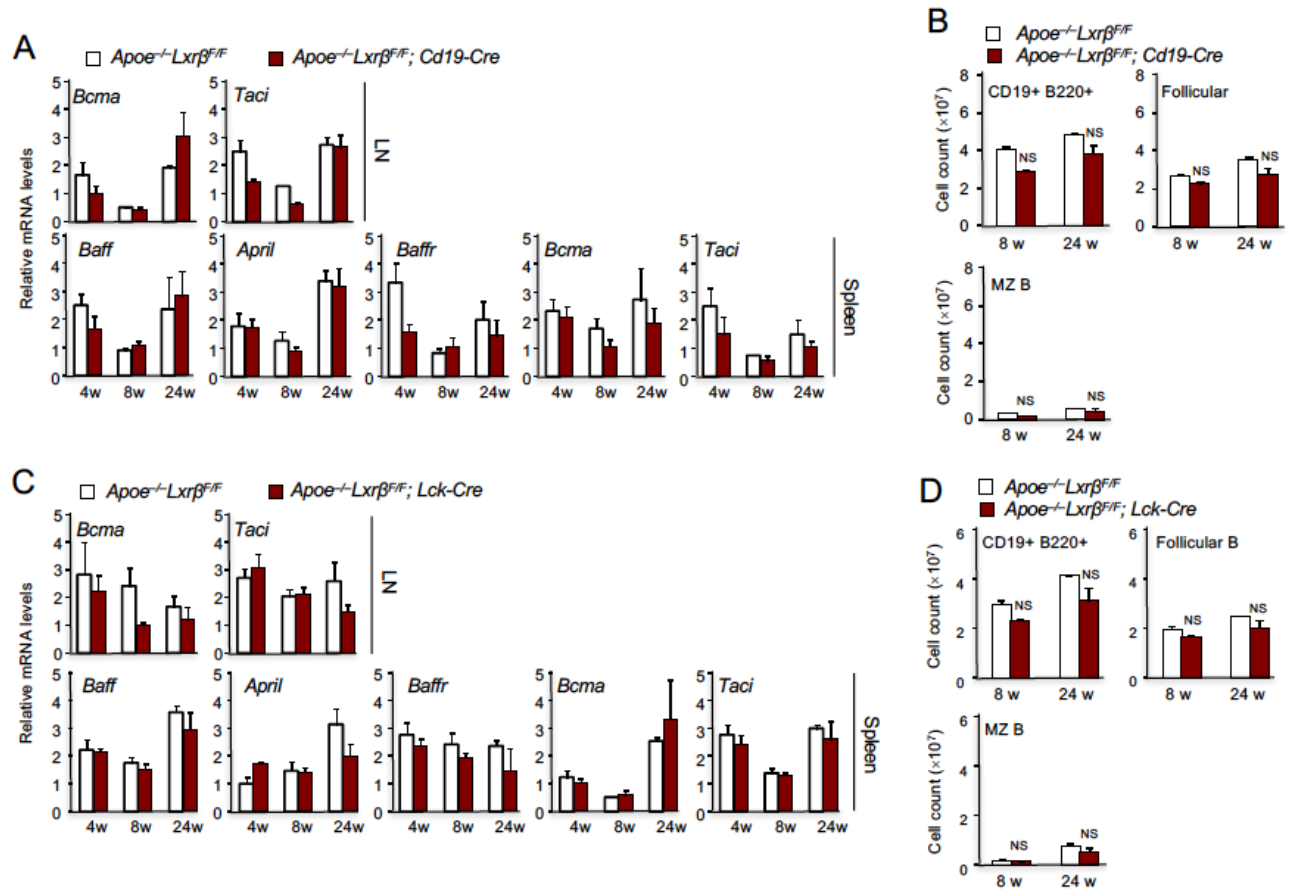

**Figure S4. Related to Figure 5. Gene-expression in T- and B-cell selective *Lxr $\beta$*  knockout mice.** Gene expression in lymph node and spleen of *Lxr $\beta$ <sup>F/F</sup>* and *Lxr $\beta$ <sup>F/F</sup>; Cd19-Cre* mice (**A**) and *Lxr $\beta$ <sup>F/F</sup>; Lck-Cre* mice (**C**) was analyzed by real-time PCR. Cell counts of indicated cell population in spleen of *Lxr $\beta$ <sup>F/F</sup>* and *Lxr $\beta$ <sup>F/F</sup>; Cd19-Cre* mice (**B**) and *Lxr $\beta$ <sup>F/F</sup>; Lck-Cre* mice (**D**) analyzed by flow cytometry. N=4-5 per group, \* $p < 0.05$ , NS, not significant. Error bars represent means  $\pm$  SEM.

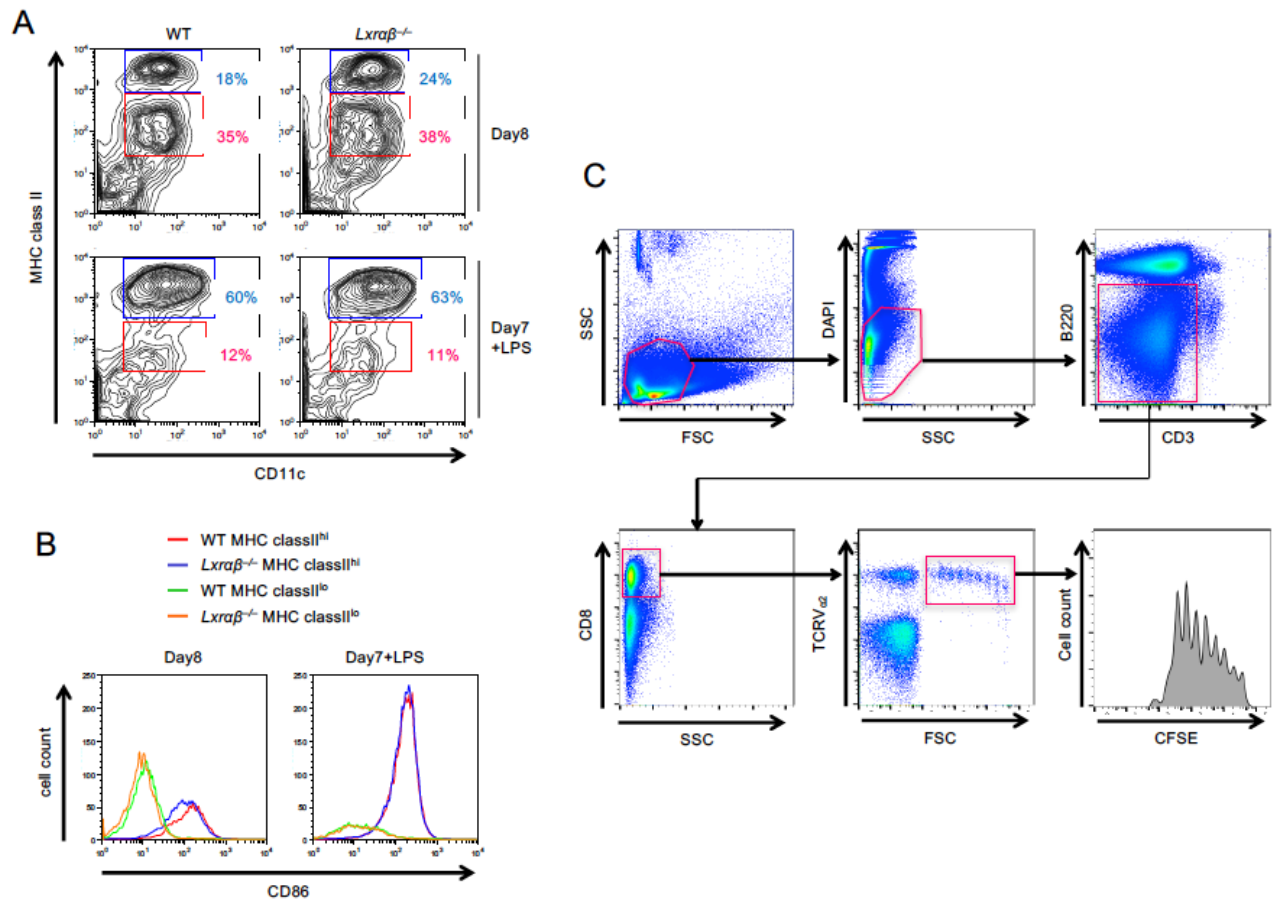

**Figure S5. Related to Figure 6. Differentiation and activation of dendritic cells *in vitro* is not affected by LXR deficiency.** (A) Bone marrow cells from wild-type and  $Lxra\beta^{-/-}$  mice were differentiated into dendritic cells with GM-CSF. The CD11c<sup>+</sup>MHC class II<sup>mid</sup> and CD11c<sup>+</sup>MHC class II<sup>hi</sup> populations were analyzed by flow cytometry on day 8 after the differentiation (upper) or 24 hours after stimulation with 2 mg/ml LPS starting on day 7 (bottom). (B) CD86 expression CD11c<sup>+</sup>MHC class II<sup>mid</sup> and CD11c<sup>+</sup>MHC class II<sup>hi</sup> populations in was determined by flow cytometry. (C) Gating strategy used for the *in vivo* T cell priming assay.

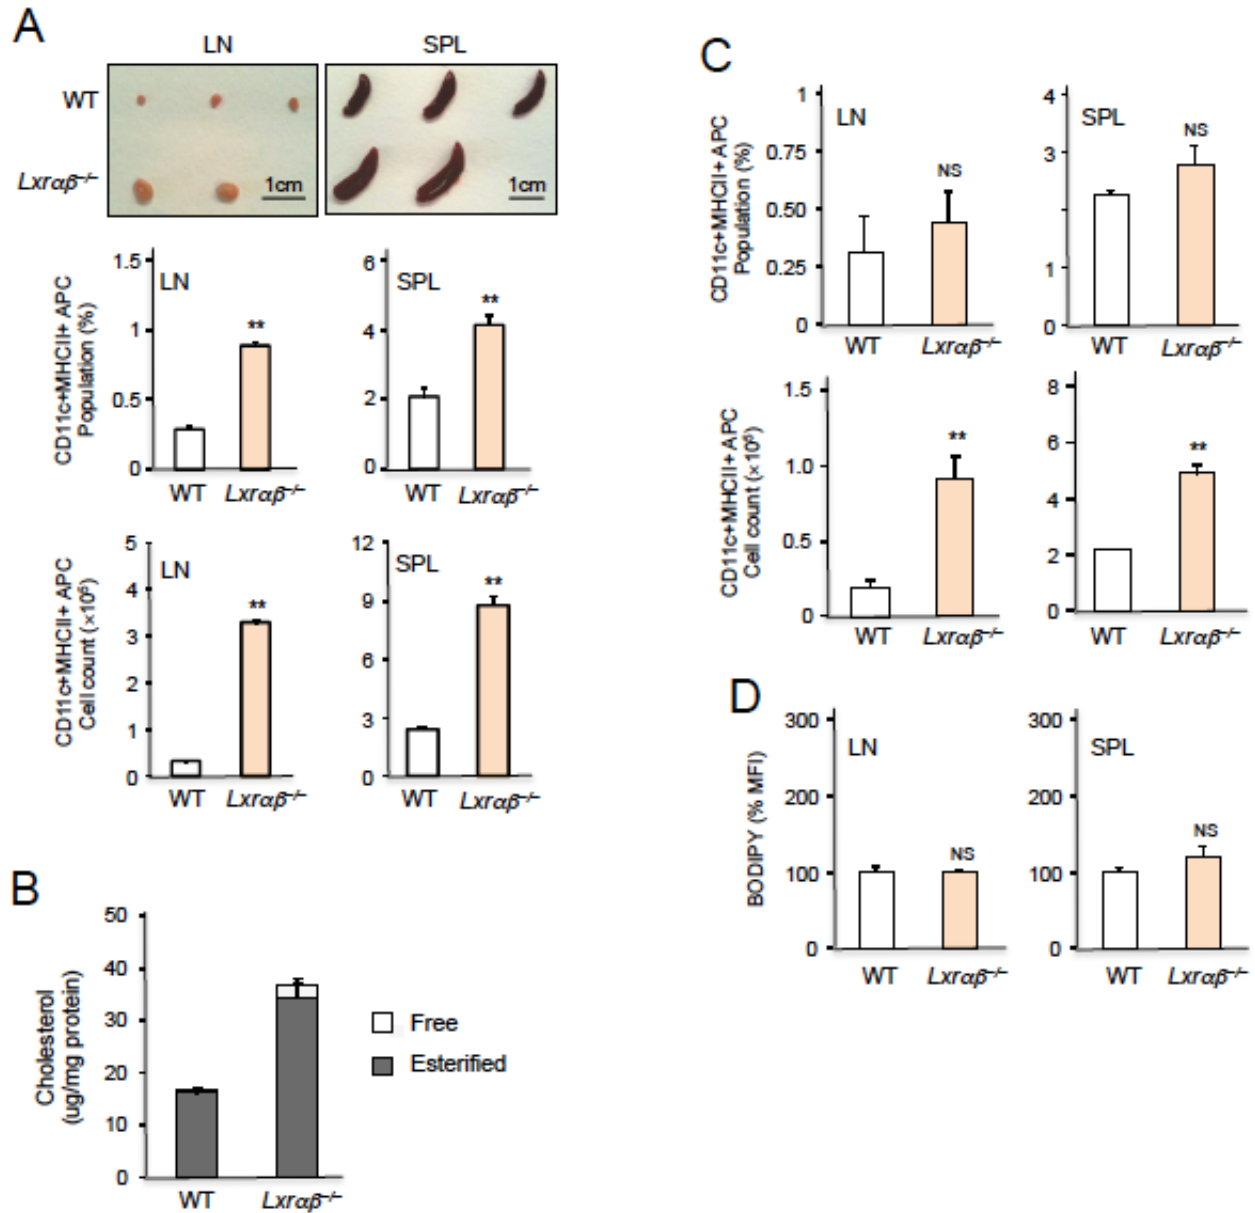

**Figure S6. Related to Figure 6. Antigen presenting cell function in LXR-deficient mice. (A)** Gross morphology of lymph node and spleen (upper), percentages (middle) and cell counts (bottom) of CD11c<sup>+</sup>MHC class II<sup>+</sup> cells in lymph node and spleen of wild-type and *Lxraβ*<sup>-/-</sup> mice fed Western diet for 12 weeks analyzed by flow cytometry. **(B)** Quantitation of free and esterified cholesterol in CD11c<sup>+</sup> APCs from wild-type or *Lxraβ*<sup>-/-</sup> mice fed Western diet for 12 weeks **(C)** Percentages and cell counts of the CD11c<sup>+</sup>MHC class II<sup>+</sup> APC population in lymph node and spleen of wild-type and *Lxraβ*<sup>-/-</sup> mice fed standard chow analyzed by flow cytometry. **(D)** Lipid content in CD11c<sup>+</sup> cells was analyzed by staining cells from lymph node and spleen of wild-type and *Lxraβ*<sup>-/-</sup> mice fed standard chow with BODIPY. MFI in CD11c<sup>+</sup> cell population was determined by flow cytometry.

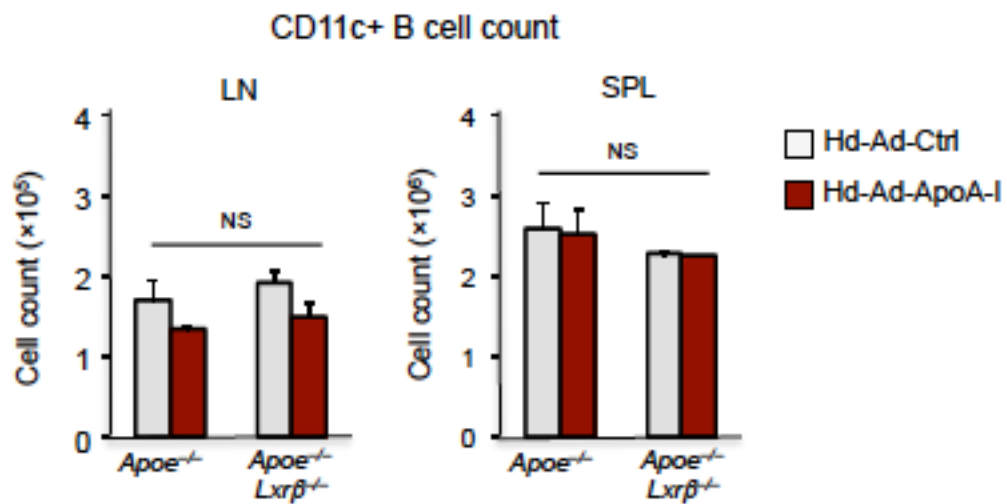

**Figure S7. Related to Figure 7. CD11c<sup>+</sup> B cells in ApoE/LXR-deficient mice expressing vector control or ApoA-I.** Cell counts of CD11c<sup>+</sup> cells gated in CD19<sup>+</sup> B220<sup>+</sup> cells by flow cytometry. N=5 per group. Statistical analysis was performed with Student's t test. NS, not significant. Error bars represent means +/- SEM.
