# Supplementary material
Source: PubMed Central journal article supplement (PMC5181791)

**A**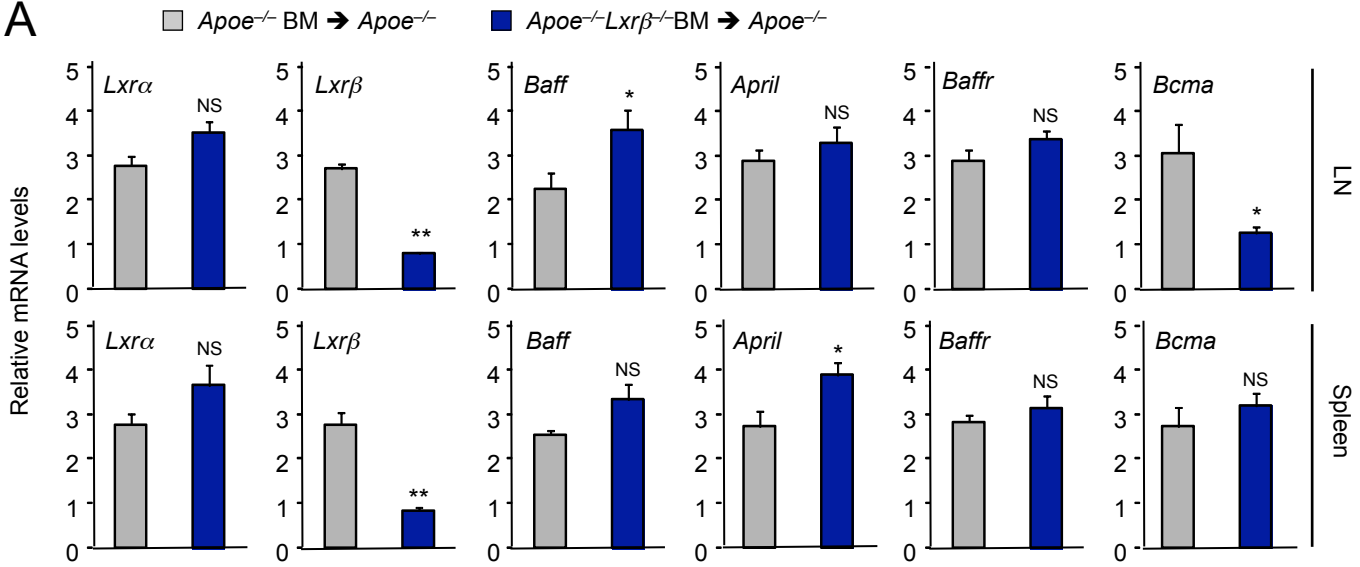**B**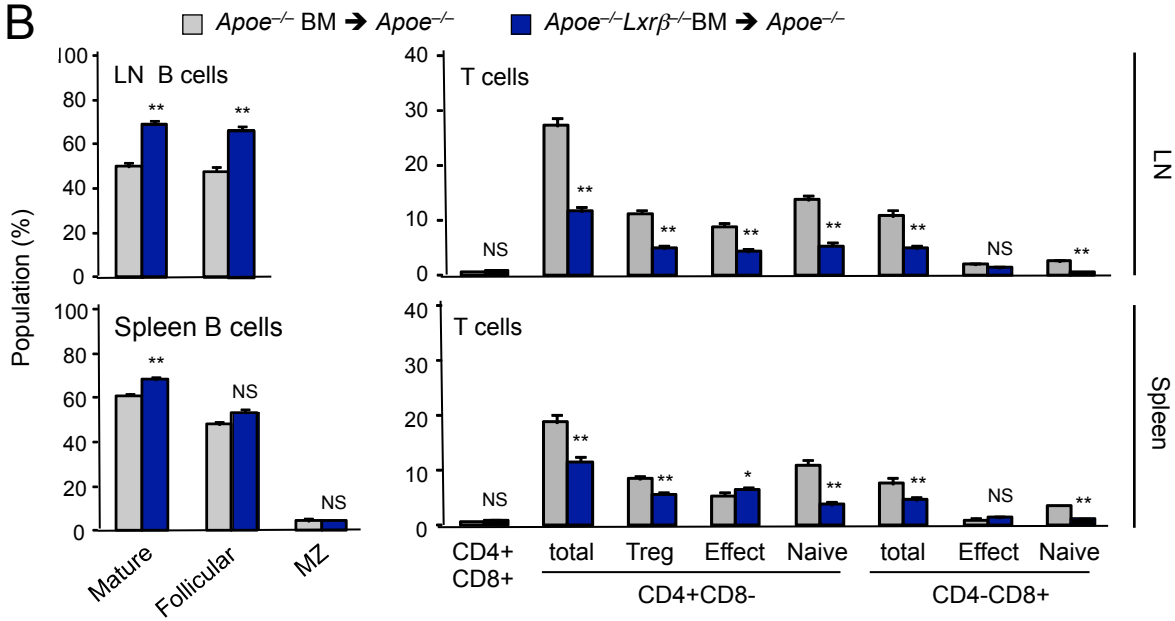**C**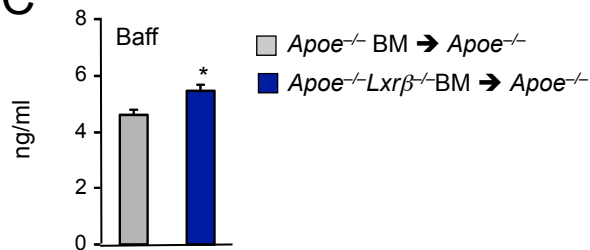

Supplement: NIHMS833946-supplement-1.pdf [file NIHMS833946-supplement-1.pdf]
